# Supplementary material
Source: PubMed Central journal article supplement (PMC3039034)
Supplement: NIHMS267493-supplement-1_si_001.pdf [file NIHMS267493-supplement-1_si_001.pdf]

# Supporting Information for:

## Application of photonic crystal enhanced fluorescence to cancer biomarker microarrays

*Cheng-Sheng Huang<sup>1</sup>, Sherine George<sup>2</sup>, Meng Lu<sup>1,3</sup>, Vikram Chaudhery<sup>1</sup>, Ruimin Tan<sup>4</sup>,*

*Richard C. Zangar<sup>4</sup> and Brian T. Cunningham<sup>1,2\*</sup>*

<sup>1</sup>Department of Electrical and Computer Engineering

<sup>2</sup>Department of Bioengineering

University of Illinois at Urbana-Champaign, USA

<sup>3</sup>SRU Biosystems, Inc., USA

<sup>4</sup>Pacific Northwest National Laboratory, USA

**Content:** Table with catalog numbers and sources for the antigens and antibodies.

**Table S-1.** Antigens, abbreviations, 1x standard concentration, antigen catalog numbers, capture antibody catalog numbers, and detection antibody catalog numbers. All the reagents are purchased from R&D Systems except <sup>(a)</sup> Fitzgerald Industries, Concord, MA, USA, <sup>(b)</sup> NeoMarkers, Fremont, CA, USA, <sup>(c)</sup> Medical & Biological Labs, Woburn, MA, USA, and <sup>(d)</sup> BioPacific, Emeryville, CA, USA.

| Antigen                                                      | Abbr.        | Max Conc. (pg/ml) | Antigen                | Primary antibody     | Secondary antibody  |
|--------------------------------------------------------------|--------------|-------------------|------------------------|----------------------|---------------------|
| Amphiregulin                                                 | AmR          | 20000             | 262-AR                 | MAB262               | BAF262              |
| Basic fibroblast growth factor                               | bFGF         | 20000             | 30-AF17 <sup>a</sup>   | MAB233               | BAM233              |
| CD14                                                         | CD14         | 100000            | 383-CD                 | MAB3833              | BAF383              |
| Epidermal growth factor                                      | EGF          | 5000              | DY-236KIT              | DY-236KIT            | DY-236KIT           |
| Epidermal growth factor receptor                             | EGFR         | 25000             | 1095-ER                | AF-231               | BAF231              |
| E-selectin                                                   | Esel         | 25000             | ADP1                   | AF-724               | BAF274              |
| Heparin-binding epidermal growth factor                      | HBEGF        | 5000              | 259-HE                 | AF-292               | BAF259              |
| c-erbB-2 extracellular domain                                | HER2         | 50000             | 1129-ER                | MAB1129 <sup>b</sup> | BAF1129             |
| Hepatocyte growth factor                                     | HGF          | 10000             | 294-HGN                | MAB694               | BAF294              |
| Intercellular adhesion molecule 1                            | ICAM         | 100000            | ADP-4-050              | MAB720               | BAF720              |
| Insulin-like growth factor 1                                 | IGF1         | 20000             | BAF291                 | MAB291               | 291GF               |
| Interleukin 1-alpha                                          | IL1 $\alpha$ | 5000              | 200-LA                 | MAB2000              | BAF200              |
| Interleukin 6                                                | IL6          | 260000            | DY206                  | DY206                | DY206               |
| Interleukin 18                                               | IL18         | 10000             | B003-5 <sup>c</sup>    | D044-3 <sup>c</sup>  | D045-6 <sup>c</sup> |
| Matrix metalloprotease 1                                     | MMP1         | 100000            | 901-MP                 | AF901                | BAF901              |
| Matrix metalloprotease 2                                     | MMP2         | 50000             | 902-MP                 | AF902                | BAF902              |
| Matrix metalloprotease 9                                     | MMP9         | 50000             | 911-MP                 | AF911                | BAF911              |
| Platelet-derived growth factor AA                            | PDGF         | 7500              | 221-AA                 | MAB221               | BAF221              |
| Prostate specific antigen                                    | PSA          | 10000             | J62800089 <sup>d</sup> | MAB1344              | BAF1344             |
| Regulated on activation normal T cell expressed and secreted | RANTES       | 5000              | 278-RN/CF              | MAB678               | BAF278              |
| Transforming growth factor alpha                             | TGF $\alpha$ | 5000              | 239A                   | AF-239-NA            | BAF239              |
| Tumor necrosis factor alpha                                  | TNF $\alpha$ | 10000             | 210-TA                 | MAB610               | BAF210              |
| Urokinase-type plasminogen receptor                          | uPAR         | 50000             | 807-UK                 | MAB807               | BAF207              |
| Vascular endothelial growth facto                            | VEGF         | 20000             | 293-VE                 | AF-293-NA            | BAF293              |
